# Supplementary material
Source: Springer Nature journal article supplement (https://www.springermedizin.de/resource/supplementary/13054_2013_3055_MOESM2_ESM.pdf/9712578)

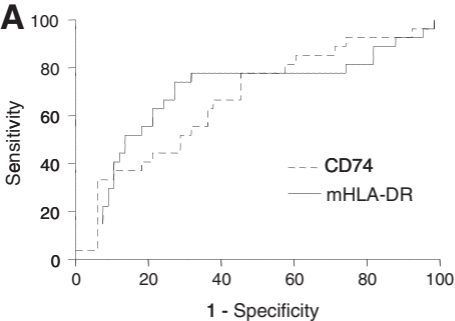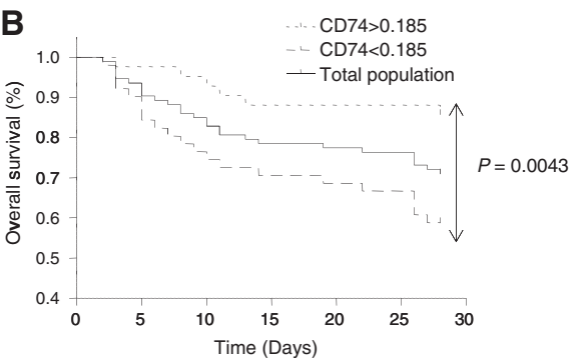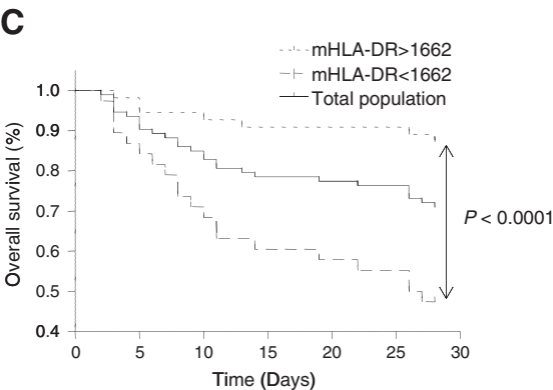

Supplement: MOESM2 [file 9712578]
